# Supplementary material
Source: PubMed Central journal article supplement (PMC8591864)
Supplement: 13063_2021_5678_MOESM4_ESM.pdf [file 13063_2021_5678_MOESM4_ESM.pdf]

# 伦理委员会批准函

## Ethics Committee Approval Letter

审查编号 Approval No.: B2020-206R

|                                                                                                                                                                                                  |                                                                                                                                                               |                                                                                                                                                                             |    |
|--------------------------------------------------------------------------------------------------------------------------------------------------------------------------------------------------|---------------------------------------------------------------------------------------------------------------------------------------------------------------|-----------------------------------------------------------------------------------------------------------------------------------------------------------------------------|----|
| 项目名称<br>Study Title                                                                                                                                                                              | 不同气腹压力对于腹腔镜下肝脏肿瘤切除术中气栓风险影响的随机、对照临床研究                                                                                                                          |                                                                                                                                                                             |    |
| 试验产品名称<br>Study Product Name                                                                                                                                                                     | NA                                                                                                                                                            | 产品类别/规格<br>Product Category                                                                                                                                                 | NA |
| 批准文号及发文单位(Approval No. and Issued By)<br>NA                                                                                                                                                      | 研究分期(Phase of Study)<br>NA                                                                                                                                    |                                                                                                                                                                             |    |
| 主要研究者(Principal Investigator)<br>钟静                                                                                                                                                              | 申办者(Sponsor)<br>复旦大学附属中山医院                                                                                                                                    |                                                                                                                                                                             |    |
| 审查方式及日期<br>(Type & Date of Review)                                                                                                                                                               | <input checked="" type="checkbox"/> 会议审查 (Meeting Review) <u>2020年08月20日</u><br><input checked="" type="checkbox"/> 快速审查(Expedited Review) <u>2020年08月21日</u> |                                                                                                                                                                             |    |
| 会议地点<br>(Meeting Location)                                                                                                                                                                       | 复旦大学附属中山医院 5 号楼 211 会议室                                                                                                                                       |                                                                                                                                                                             |    |
| 会议出席情况<br>(Meeting Attendance)                                                                                                                                                                   | 出席(Attendance) <u>10</u> 人, 投票(Vote) <u>10</u> 人, 回避(Avoidance) <u>0</u> 人                                                                                    |                                                                                                                                                                             |    |
| 下列研究相关文件已经批准<br>The following documents have been approved                                                                                                                                       |                                                                                                                                                               |                                                                                                                                                                             |    |
| 1. 研究方案: v2.0 2020.08.20<br>2. 知情同意书: v2.0 2020.08.20<br>3. 研究者简历<br>4. 研究人员名单<br>5. 病例报告表: v1.0, 2020.08.08                                                                                     |                                                                                                                                                               |                                                                                                                                                                             |    |
| 审查决定 Decision for this proposal and have been [ <input checked="" type="checkbox"/> ]:<br><input checked="" type="checkbox"/> 同意 Approval                                                        |                                                                                                                                                               |                                                                                                                                                                             |    |
| 持续审查频率: <input type="checkbox"/> 3 个月/3 Months <input type="checkbox"/> 6 个月/6 Months <input checked="" type="checkbox"/> 1 年/1Year <input type="checkbox"/> 不适用/NA<br>批准函有效期至: 2021 年 08 月 21 日 |                                                                                                                                                               |                                                                                                                                                                             |    |
| 主任委员/副主任委员签名 Chair/Vice Chair Signature:                                                                                                                                                         |                                                                                                                                                               | 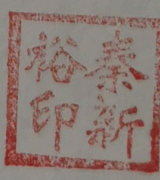  |    |
| 批准日期 Approval Date:                                                                                                                                                                              |                                                                                                                                                               | 2020.8.21                                                                                                                                                                   |    |
| 复旦大学附属中山医院伦理委员会(盖章)Stamp of ZSEC                                                                                                                                                                 |                                                                                                                                                               |                                                                                                                                                                             |    |



**Ethics Committee Approval Letter**

**Approval NO: B2020-206R**

|                                                                                                                                                                                                                                                                                                                                                                                                                                                 |                                                                                                                                                |                                                       |    |
|-------------------------------------------------------------------------------------------------------------------------------------------------------------------------------------------------------------------------------------------------------------------------------------------------------------------------------------------------------------------------------------------------------------------------------------------------|------------------------------------------------------------------------------------------------------------------------------------------------|-------------------------------------------------------|----|
| <b>Study Title</b>                                                                                                                                                                                                                                                                                                                                                                                                                              | Gas embolism under standard versus low pneumoperitoneum pressure during laparoscopic liver resection (GASES): a randomized, controlled trial   |                                                       |    |
| <b>Study Product Name</b>                                                                                                                                                                                                                                                                                                                                                                                                                       | NA                                                                                                                                             | <b>Product Category</b>                               | NA |
| <b>Approval NO. and Issued By:</b> NA                                                                                                                                                                                                                                                                                                                                                                                                           |                                                                                                                                                | <b>Phase of Study:</b> NA                             |    |
| <b>Principal Investigator</b><br>Jing Zhong                                                                                                                                                                                                                                                                                                                                                                                                     |                                                                                                                                                | <b>Sponsor</b><br>Zhongshan Hospital Fudan University |    |
| <b>Type &amp; Date of Review</b>                                                                                                                                                                                                                                                                                                                                                                                                                | <input checked="" type="checkbox"/> <b>Meeting Review:</b> 20-08-2020<br><input checked="" type="checkbox"/> <b>Expedited Review:</b> 21-08-20 |                                                       |    |
| <b>Meeting Location</b>                                                                                                                                                                                                                                                                                                                                                                                                                         | No.211 Meeting Room, Building 5, Zhongshan Hospital Fudan University                                                                           |                                                       |    |
| <b>Meeting Attendance</b>                                                                                                                                                                                                                                                                                                                                                                                                                       | Attendance: 10 Persons<br>Vote: 10 Persons<br>Avoidance: 0 Person                                                                              |                                                       |    |
| The following documents have been approved: <ol style="list-style-type: none"> <li>1. Study design: version 2.0 of 20-08-2020</li> <li>2. Informed consent: version 2.0 of 20-08-2020</li> <li>3. Principal investigator profile</li> <li>4. The list of investigators</li> <li>5. Case report form: version1.0 of 08-08-2020</li> </ol>                                                                                                        |                                                                                                                                                |                                                       |    |
| Decision for this proposal and have been [ <input checked="" type="checkbox"/> ]:<br><input checked="" type="checkbox"/> Approval<br>Frequency of continuous review: <input type="checkbox"/> 3Months <input type="checkbox"/> 6Months <input checked="" type="checkbox"/> 1 Year <input type="checkbox"/> NA<br>Expiration of approval letter: 21-08-2021<br>Chair/Vice Chair Signature: Xinyu Qin<br>Approval Date: 21-08-2020 Stamp of ZSEC: |                                                                                                                                                |                                                       |    |

A-024 Version:3.4
